# Supplementary material for: Structure-based thermodynamics of ion selectivity (Mg2+versus Ca2+ and K+versus Na+) in the active site of the eukaryotic lariat group II intron from algae Pylaiella littoralis
Source: Royal Society of Chemistry journal article supplement (doi:10.1039/d2cp03472g), 2022-01-01

**ELECTRONIC SUPPLEMENTARY INFORMATION**

**Structure-Based Thermodynamics of Ion Selectivity ( $Mg^{2+}$  versus  $Ca^{2+}$  and  $K^+$  versus  $Na^+$ ) in the active site of the eukaryotic lariat group II intron from algae *Pylaiella littoralis***

Abhishek Kumar and Priyadarshi Satpati\*

Department of Biosciences and Bioengineering, Indian Institute of Technology Guwahati,  
Guwahati 781039, Assam, India

\* Correspondence and requests for materials should be addressed to P.S. (Tel: +91-361-2583205, Fax: +91-361-2582249, e-mail: psatpati@iitg.ac.in)

## Table of Contents

|                 |     |
|-----------------|-----|
| Table S1 .....  | S3  |
| Table S2 .....  | S3  |
| Table S3 .....  | S4  |
| Table S4 .....  | S6  |
| Table S5 .....  | S7  |
| Table S6 .....  | S8  |
| Table S7 .....  | S8  |
| Figure S1 ..... | S9  |
| Figure S2 ..... | S10 |
| Figure S3 ..... | S11 |
| Figure S4 ..... | S12 |
| Figure S5 ..... | S13 |
| Figure S6 ..... | S14 |

**Table S1.** Details of biomolecular systems considered for classical MD simulations.

| System                    | Number of atoms | Number of water molecules | Number of Divalent ions | Number of Monovalent ions |
|---------------------------|-----------------|---------------------------|-------------------------|---------------------------|
| Pre-hydrolytic (2s) state | 47731           | 14410                     | 25                      | 05                        |
| Post-hydrolytic state     | 47852           | 14530                     | 14                      | 01                        |

**Table S2.** Simulation time scale (in *ns*) and estimated free energetics (in  $\text{kcal mol}^{-1}$ ) from the alchemical transformation of  $\text{Mg}^{2+} \rightarrow \text{Ca}^{2+}$ , and  $\text{K}^+ \rightarrow \text{Na}^+$  in water (Free) and in complex with lariat group II intron at pre-hydrolytic (2s) and post-hydrolytic state.

| Alchemical transformation                   | System                    | Replica       | MD Free energy calculations Time (ns) | Estimated $\Delta G$ ( $\text{kcal mol}^{-1}$ ) |
|---------------------------------------------|---------------------------|---------------|---------------------------------------|-------------------------------------------------|
| $\text{Mg}^{2+} \rightarrow \text{Ca}^{2+}$ | Free in water             | Replica 1     | 22                                    | 68.90 (0.41)                                    |
|                                             |                           | Replica 2     | 22                                    | 68.83 (0.56)                                    |
|                                             |                           | Replica 3     | 22                                    | 68.64 (0.62)                                    |
|                                             |                           | Replica 4     | 22                                    | 68.69 (0.67)                                    |
|                                             |                           | Replica 5     | 22                                    | 68.81 (0.49)                                    |
|                                             |                           |               | <b>Average</b>                        | <b>68.77 <math>\pm</math>0.11</b>               |
|                                             | Pre-hydrolytic (2s) state | Replica 1     | 22                                    | 150.56 (1.57)                                   |
|                                             |                           | Replica 2     | 22                                    | 150.38 (1.52)                                   |
|                                             |                           | Replica 3     | 22                                    | 150.74 (1.67)                                   |
|                                             |                           | Replica 4     | 22                                    | 150.22 (2.23)                                   |
|                                             |                           | Replica 5     | 22                                    | 151.68 (1.10)                                   |
|                                             |                           | Replica 6     | 22                                    | 151.52 (0.79)                                   |
|                                             |                           |               | <b>Average</b>                        | <b>150.85 (0.61)</b>                            |
|                                             | Post-hydrolytic state     | Replica 1     | 22                                    | 156.45 (1.78)                                   |
|                                             |                           | Replica 2     | 22                                    | 157.69 (1.40)                                   |
|                                             |                           | Replica 3     | 22                                    | 155.18 (2.56)                                   |
|                                             |                           | Replica 4     | 22                                    | 158.53 (1.57)                                   |
|                                             |                           | Replica 5     | 22                                    | 157.91 (1.41)                                   |
|                                             |                           | Replica 6     | 22                                    | 157.88 (1.56)                                   |
|                                             |                           |               | <b>Average</b>                        | <b>157.27 (1.23)</b>                            |
|                                             | Free in water             | Free in water | Replica 1                             | 22                                              |
| Replica 2                                   |                           |               | 22                                    | -23.45 (0.35)                                   |
| Replica 3                                   |                           |               | 22                                    | -23.36 (0.56)                                   |
| Replica 4                                   |                           |               | 22                                    | -23.28 (0.28)                                   |
| Replica 5                                   |                           |               | 22                                    | -23.51 (0.37)                                   |
|                                             |                           |               | <b>Average</b>                        | <b>-23.41 (0.09)</b>                            |
| Free in water                               |                           | Replica 1     | 22                                    | -22.53 (0.72)                                   |
|                                             |                           | Replica 2     | 22                                    | -20.09 (0.41)                                   |
|                                             |                           | Replica 3     | 22                                    | -21.57 (0.55)                                   |
|                                             |                           | Replica 4     | 22                                    | -20.61 (1.56)                                   |

|                        |                           |                |                      |                      |
|------------------------|---------------------------|----------------|----------------------|----------------------|
| $K^+ \rightarrow Na^+$ | Pre-hydrolytic (2s) state | Replica 5      | 22                   | -21.49 (0.38)        |
|                        |                           | Replica 6      | 22                   | -22.40 (0.77)        |
|                        |                           | <b>Average</b> |                      | <b>-21.45 (0.96)</b> |
|                        | Post-hydrolytic state     | Replica 1      | 22                   | -23.56 (0.98)        |
|                        |                           | Replica 2      | 22                   | -22.84 (0.94)        |
|                        |                           | Replica 3      | 22                   | -22.90 (1.43)        |
|                        |                           | Replica 4      | 22                   | -25.77 (1.08)        |
|                        |                           | Replica 5      | 22                   | -25.37 (1.15)        |
|                        |                           | Replica 6      | 22                   | -24.35 (0.56)        |
|                        | <b>Average</b>            |                | <b>-24.13 (1.25)</b> |                      |

**Table S3.** Alchemical coordinate  $\lambda$  was defined that connects end states, i.e.,  $\lambda=1$  corresponds to  $Mg^{2+}/K^+$ , and  $\lambda=0$  corresponds to  $Ca^{2+}/Na^+$ . Free energy derivative  $\partial G/\partial \lambda$  was calculated for alchemical transformation  $Mg^{2+} \rightarrow Ca^{2+}/K^+ \rightarrow Na^+$  for 11  $\lambda$  points between 1 and 0. Free energy derivative was calculated as  $\partial G/\partial \lambda = \langle U(\lambda=1) - U(\lambda=0) \rangle_\lambda$ , where  $\langle \rangle$  represents averaging over MD trajectory at a specific value of  $\lambda$ . Alchemical transformation associated free energies (in kcal mol<sup>-1</sup>) was calculated by numerically integrating  $\partial G/\partial \lambda$  vs  $\lambda$  plot. The MD trajectories were divided into two equal halves and the difference between the computed  $\partial G/\partial \lambda$ 's from the two halves is reported as uncertainty in the parenthesis at each  $\lambda$  point. Derivative at each  $\lambda$  is given below:

**$Mg^{2+} \rightarrow Ca^{2+}$  free in water**

| $\lambda$  | Replica 1           | Replica 2           | Replica 3           | Replica 4           | Replica 5           |
|------------|---------------------|---------------------|---------------------|---------------------|---------------------|
| 1.00       | -154.32 (0.71)      | -155.68 (0.08)      | -154.70 (0.53)      | -154.85 (0.80)      | -154.39 (1.78)      |
| 0.90       | -122.17 (0.07)      | -121.06 (1.49)      | -121.23 (0.73)      | -121.03 (1.34)      | -121.43 (0.32)      |
| 0.80       | -100.19 (1.13)      | -99.68 (0.81)       | -100.28 (0.08)      | -99.83 (0.92)       | -100.40 (0.10)      |
| 0.70       | -84.15 (0.54)       | -84.29 (0.36)       | -83.57 (0.01)       | -84.65 (0.40)       | -84.29 (0.34)       |
| 0.60       | -71.84 (0.67)       | -72.20 (0.27)       | -71.67 (0.01)       | -72.30 (1.51)       | -71.62 (0.46)       |
| 0.50       | -62.06 (0.40)       | -61.58 (0.72)       | -61.76 (0.14)       | -61.75 (0.58)       | -61.55 (0.90)       |
| 0.40       | -53.75 (0.95)       | -53.00 (0.62)       | -52.40 (2.23)       | -52.69 (1.68)       | -53.13 (0.08)       |
| 0.30       | -44.51 (1.38)       | -45.29 (0.74)       | -45.04 (0.72)       | -44.16 (0.90)       | -45.47 (0.20)       |
| 0.20       | -34.47 (0.15)       | -34.13 (1.97)       | -34.11 (0.56)       | -34.65 (2.56)       | -34.70 (0.35)       |
| 0.10       | -26.93 (0.24)       | -27.41 (0.26)       | -27.44 (0.44)       | -26.79 (0.33)       | -26.77 (0.29)       |
| 0.00       | -23.55 (0.43)       | -23.64 (0.63)       | -23.17 (0.40)       | -23.30 (0.50)       | -23.09 (0.36)       |
| $\Delta G$ | <b>68.90 (0.41)</b> | <b>68.83 (0.56)</b> | <b>68.64 (0.62)</b> | <b>68.69 (0.67)</b> | <b>68.81 (0.49)</b> |

**$Mg^{2+} \rightarrow Ca^{2+}$  pre-hydrolytic (2s) state**

| $\lambda$  | Replica 1            | Replica 2            | Replica 3            | Replica 4            | Replica 5            | Replica 6            |
|------------|----------------------|----------------------|----------------------|----------------------|----------------------|----------------------|
| 1.00       | -335.63 (3.37)       | -335.68 (5.39)       | -334.78 (3.67)       | -338.06 (7.88)       | -340.30 (0.38)       | -352.04 (0.76)       |
| 0.90       | -257.91 (3.01)       | -257.09 (2.04)       | -261.65 (2.03)       | -256.23 (3.94)       | -261.06 (0.39)       | -260.39 (2.40)       |
| 0.80       | -210.25 (0.62)       | -212.41 (2.59)       | -215.20 (0.78)       | -210.22 (0.71)       | -214.50 (0.29)       | -213.68 (1.72)       |
| 0.70       | -174.19 (0.49)       | -180.32 (0.51)       | -179.85 (2.47)       | -174.01 (0.28)       | -181.21 (1.66)       | -178.65 (0.60)       |
| 0.60       | -150.06 (1.75)       | -150.73 (0.96)       | -149.41 (5.45)       | -150.70 (0.67)       | -151.32 (2.33)       | -153.47 (0.12)       |
| 0.50       | -129.55 (1.46)       | -130.64 (0.65)       | -127.41 (1.80)       | -129.31 (0.86)       | -132.07 (0.89)       | -132.65 (1.23)       |
| 0.40       | -115.88 (0.26)       | -114.35 (0.73)       | -109.92 (0.20)       | -110.80 (1.10)       | -113.77 (0.00)       | -112.11 (0.31)       |
| 0.30       | -101.74 (0.39)       | -93.27 (2.35)        | -99.20 (0.53)        | -100.43 (1.29)       | -100.31 (0.86)       | -96.80 (0.07)        |
| 0.20       | -88.25 (0.25)        | -86.26 (0.09)        | -86.93 (0.50)        | -89.29 (0.42)        | -86.81 (1.48)        | -84.47 (0.36)        |
| 0.10       | -76.86 (1.60)        | -77.43 (0.31)        | -76.60 (0.61)        | -79.08 (1.14)        | -75.45 (1.33)        | -74.16 (0.49)        |
| 0.00       | -66.20 (4.13)        | -66.91 (1.14)        | -67.54 (0.36)        | -66.21 (6.22)        | -60.13 (2.50)        | -65.60 (0.68)        |
| $\Delta G$ | <b>150.56 (1.57)</b> | <b>150.38 (1.52)</b> | <b>150.74 (1.67)</b> | <b>150.22 (2.23)</b> | <b>151.68 (1.10)</b> | <b>151.52 (0.79)</b> |

**Mg<sup>2+</sup>→Ca<sup>2+</sup> post-hydrolytic state**

| $\lambda$  | Replica 1            | Replica 2            | Replica 3            | Replica 4            | Replica 5            | Replica 6            |
|------------|----------------------|----------------------|----------------------|----------------------|----------------------|----------------------|
| 1.00       | -367.73 (2.92)       | -367.97 (4.29)       | -375.10 (2.43)       | -373.72 (3.58)       | -365.99 (2.08)       | -355.53 (4.87)       |
| 0.90       | -277.77 (1.59)       | -278.79 (0.86)       | -284.41 (2.30)       | -279.84 (0.08)       | -277.56 (0.46)       | -275.85 (0.77)       |
| 0.80       | -224.61 (4.11)       | -224.59 (1.26)       | -229.78 (2.72)       | -226.46 (0.28)       | -226.29 (2.52)       | -223.92 (1.85)       |
| 0.70       | -187.08 (1.76)       | -188.54 (2.11)       | -173.30 (4.17)       | -189.90 (0.47)       | -188.32 (0.11)       | -185.83 (3.30)       |
| 0.60       | -159.54 (2.00)       | -160.21 (0.63)       | -146.71 (1.31)       | -159.40 (1.92)       | -160.00 (1.31)       | -158.89 (0.89)       |
| 0.50       | -135.76 (2.11)       | -136.91 (0.45)       | -130.55 (2.41)       | -135.63 (0.91)       | -138.28 (0.04)       | -137.04 (1.37)       |
| 0.40       | -115.40 (0.47)       | -117.41 (0.59)       | -113.34 (4.45)       | -118.19 (1.10)       | -117.55 (0.15)       | -116.73 (1.30)       |
| 0.30       | -100.35 (2.27)       | -98.72 (3.56)        | -94.73 (2.77)        | -97.85 (5.29)        | -103.04 (1.42)       | -102.22 (0.91)       |
| 0.20       | -79.69 (0.43)        | -83.83 (0.69)        | -85.22 (4.70)        | -84.10 (0.47)        | -80.14 (1.84)        | -89.60 (0.84)        |
| 0.10       | -70.82 (1.05)        | -72.03 (0.16)        | -74.38 (0.83)        | -74.02 (1.08)        | -74.78 (2.52)        | -77.41 (0.68)        |
| 0.00       | -59.20 (0.92)        | -63.65 (0.77)        | -63.60 (0.10)        | -65.94 (2.05)        | -60.13 (3.11)        | -67.12 (0.38)        |
| $\Delta G$ | <b>156.45 (1.78)</b> | <b>157.69 (1.40)</b> | <b>155.18 (2.56)</b> | <b>158.53 (1.57)</b> | <b>157.91 (1.41)</b> | <b>157.88 (1.56)</b> |

**K<sup>+</sup>→Na<sup>+</sup> free in water**

| $\lambda$  | Replica 1            | Replica 2            | Replica 3            | Replica 4            | Replica 5            |
|------------|----------------------|----------------------|----------------------|----------------------|----------------------|
| 1.00       | 07.25 (0.06)         | 07.12 (0.20)         | 07.28 (0.02)         | 07.28 (0.27)         | 07.20 (0.12)         |
| 0.90       | 08.97 (0.22)         | 08.95 (0.06)         | 08.78 (0.19)         | 08.91 (0.02)         | 08.98 (0.23)         |
| 0.80       | 10.52 (0.00)         | 11.05 (0.22)         | 10.95 (0.07)         | 10.80 (0.36)         | 11.05 (0.30)         |
| 0.70       | 13.23 (0.11)         | 13.60 (0.31)         | 13.33 (0.33)         | 13.63 (0.00)         | 13.17 (0.70)         |
| 0.60       | 16.49 (0.11)         | 16.41 (0.31)         | 16.46 (0.71)         | 15.99 (0.38)         | 16.12 (0.21)         |
| 0.50       | 20.00 (0.29)         | 20.23 (0.90)         | 20.01 (0.18)         | 19.89 (0.02)         | 20.25 (0.22)         |
| 0.40       | 24.41 (0.32)         | 24.24 (0.19)         | 24.19 (1.02)         | 24.12 (0.70)         | 24.52 (0.24)         |
| 0.30       | 29.87 (1.23)         | 29.76 (0.00)         | 29.17 (0.00)         | 30.11 (0.56)         | 30.40 (0.62)         |
| 0.20       | 36.35 (0.28)         | 35.90 (0.10)         | 36.24 (0.38)         | 35.08 (0.28)         | 36.34 (0.90)         |
| 0.10       | 44.38 (1.72)         | 44.27 (0.88)         | 43.91 (1.35)         | 43.88 (0.52)         | 43.88 (0.52)         |
| 0.00       | 53.73 (0.24)         | 53.01 (0.75)         | 53.92 (2.01)         | 53.56 (0.02)         | 53.59 (0.02)         |
| $\Delta G$ | <b>-23.47 (0.42)</b> | <b>-23.45 (0.36)</b> | <b>-23.36 (0.57)</b> | <b>-23.28 (0.28)</b> | <b>-23.51 (0.37)</b> |

**K<sup>+</sup>→Na<sup>+</sup> pre-hydrolytic (2s) state**

| $\lambda$  | Replica 1            | Replica 2            | Replica 3            | Replica 4            | Replica 5            | Replica 6            |
|------------|----------------------|----------------------|----------------------|----------------------|----------------------|----------------------|
| 1.00       | 6.27 (0.07)          | 6.75 (0.19)          | 6.67 (1.12)          | 4.47 (0.28)          | 6.38 (0.06)          | 6.17 (0.18)          |
| 0.90       | 7.39 (0.30)          | 8.11 (0.31)          | 7.11 (0.26)          | 6.08 (1.80)          | 7.38 (0.61)          | 7.71 (0.38)          |
| 0.80       | 11.02 (0.60)         | 10.12 (0.26)         | 8.69 (0.78)          | 7.00 (1.27)          | 11.59 (0.17)         | 10.42 (0.22)         |
| 0.70       | 13.31 (0.45)         | 14.51 (0.45)         | 10.75 (0.01)         | 8.51 (1.29)          | 13.03 (0.33)         | 12.32 (0.63)         |
| 0.60       | 16.87 (0.21)         | 16.33 (0.29)         | 15.01 (0.01)         | 9.55 (0.51)          | 14.36 (0.02)         | 14.96 (0.10)         |
| 0.50       | 21.51 (0.22)         | 18.27 (0.74)         | 19.71 (0.30)         | 22.38 (0.88)         | 14.84 (0.03)         | 18.95 (0.20)         |
| 0.40       | 23.27 (0.06)         | 21.43 (0.04)         | 22.35 (0.64)         | 26.24 (0.80)         | 22.96 (0.94)         | 26.38 (0.72)         |
| 0.30       | 27.62 (2.63)         | 24.49 (0.14)         | 27.57 (0.03)         | 28.47 (1.74)         | 27.91 (0.74)         | 30.06 (1.20)         |
| 0.20       | 35.50 (0.88)         | 29.81 (0.85)         | 34.31 (0.71)         | 30.67 (2.27)         | 34.99 (0.96)         | 37.32 (1.38)         |
| 0.10       | 41.11 (0.50)         | 33.07 (0.15)         | 41.65 (0.03)         | 39.90 (0.44)         | 39.41 (0.17)         | 37.97 (1.81)         |
| 0.00       | 48.99 (2.03)         | 42.81 (1.11)         | 50.26 (2.18)         | 50.02 (5.90)         | 50.32 (0.13)         | 49.50 (1.70)         |
| $\Delta G$ | <b>-22.53 (0.72)</b> | <b>-20.09 (0.41)</b> | <b>-21.57 (0.55)</b> | <b>-20.61 (1.56)</b> | <b>-21.49 (0.38)</b> | <b>-22.40 (0.77)</b> |

**K<sup>+</sup>→Na<sup>+</sup> post-hydrolytic state**

| $\lambda$ | Replica 1    | Replica 2    | Replica 3    | Replica 4    | Replica 5    | Replica 6    |
|-----------|--------------|--------------|--------------|--------------|--------------|--------------|
| 1.00      | 7.88 (0.18)  | 7.07 (0.26)  | 7.58 (0.33)  | 7.46 (0.37)  | 6.33 (0.30)  | 7.38 (0.17)  |
| 0.90      | 9.15 (0.76)  | 8.43 (0.68)  | 8.00 (0.42)  | 9.90 (0.99)  | 8.05 (0.69)  | 9.01 (0.79)  |
| 0.80      | 11.05 (1.37) | 10.75 (0.57) | 10.29 (0.02) | 11.75 (0.14) | 10.25 (0.68) | 11.50 (0.29) |
| 0.70      | 13.87 (2.68) | 12.67 (0.10) | 12.71 (0.70) | 14.72 (1.62) | 14.54 (1.16) | 13.93 (0.03) |

|            |                      |                      |                      |                      |                      |                      |
|------------|----------------------|----------------------|----------------------|----------------------|----------------------|----------------------|
| 0.60       | 17.70 (0.97)         | 16.23 (0.31)         | 16.00 (1.00)         | 18.38 (0.91)         | 16.09 (0.22)         | 17.18 (0.78)         |
| 0.50       | 21.06 (1.59)         | 18.63 (1.95)         | 19.36 (2.52)         | 22.13 (0.54)         | 25.92 (0.38)         | 19.89 (0.21)         |
| 0.40       | 25.28 (0.06)         | 24.49 (0.86)         | 25.24 (0.60)         | 24.69 (1.52)         | 27.89 (2.82)         | 24.83 (0.46)         |
| 0.30       | 28.87 (0.94)         | 29.05 (0.35)         | 28.34 (3.21)         | 30.98 (0.18)         | 34.26 (1.74)         | 29.03 (0.39)         |
| 0.20       | 36.37 (0.26)         | 35.28 (1.44)         | 36.21 (0.32)         | 41.10 (0.81)         | 34.32 (0.04)         | 37.38 (1.12)         |
| 0.10       | 42.87 (0.80)         | 42.34 (0.86)         | 42.53 (1.07)         | 50.41 (1.86)         | 49.84 (3.13)         | 48.47 (0.76)         |
| 0.00       | 50.81 (0.37)         | 54.01 (2.99)         | 52.94 (5.54)         | 59.71 (2.97)         | 58.60 (1.51)         | 57.03 (1.16)         |
| $\Delta G$ | <b>-23.56 (0.98)</b> | <b>-22.84 (0.94)</b> | <b>-22.90 (1.43)</b> | <b>-25.77 (1.08)</b> | <b>-25.37 (1.15)</b> | <b>-24.35 (0.56)</b> |

**Table S4.** Estimated  $Mg^{2+}$  vs.  $Ca^{2+}$  and  $K^+$  vs.  $Na^+$  relative binding free energy ( $\Delta\Delta G$  in kcal  $mol^{-1}$ , averaged from various MD runs) to the lariat group II intron active site.

| Alchemical path               | State                     | $\Delta G_{Comp}$ | $\Delta G_{free}$ | $\Delta\Delta G$ (kcal $mol^{-1}$ ) |
|-------------------------------|---------------------------|-------------------|-------------------|-------------------------------------|
| $Mg^{2+} \rightarrow Ca^{2+}$ | Pre-hydrolytic (2s) state | $150.85 \pm 0.61$ | $137.64 \pm 0.13$ | $13.21 \pm 0.62$                    |
|                               | Post-hydrolytic state     | $157.57 \pm 1.23$ |                   | $19.93 \pm 1.24$                    |
| $K^+ \rightarrow Na^+$        | Pre-hydrolytic (2s) state | $-21.45 \pm 0.96$ | $-23.41 \pm 0.09$ | $-1.96 \pm 0.96$                    |
|                               | Post-hydrolytic state     | $-24.13 \pm 1.25$ |                   | $0.72 \pm 1.25$                     |

| Alchemical path<br><b>CHARMM27<br/>Force-field</b> | State                     | $\Delta G_{Comp}$<br>(Averaged over<br>two replicas) | $\Delta G_{free}$<br>(Averaged<br>over two<br>replicas) | $\Delta\Delta G$ (kcal $mol^{-1}$ )<br><b>[ CHARMM27<br/>Force-field ]</b> |
|----------------------------------------------------|---------------------------|------------------------------------------------------|---------------------------------------------------------|----------------------------------------------------------------------------|
| $Mg^{2+} \rightarrow Ca^{2+}$                      | Pre-hydrolytic (2s) state | $151.54 \pm 1.12$                                    | $137.64 \pm 0.02$                                       | $13.9 \pm 1.12$                                                            |

**Table S5.** Single point energies estimated from quantum chemical calculations for lariat group II intron at pre-hydrolytic (2s) and post-hydrolytic state. The free state was obtained by deleting the RNA part, thus, the solvation shells of the ions were incomplete in the modeled free state.

| System                          | Theory                          | Snap         | Energy (in hartree)             |                                        |                                     |                                    | E4+E3-(E1+E2)*627.5095<br>= $\Delta E$<br>(in kcal mol <sup>-1</sup> ) |
|---------------------------------|---------------------------------|--------------|---------------------------------|----------------------------------------|-------------------------------------|------------------------------------|------------------------------------------------------------------------|
|                                 |                                 |              | (E1)<br>[Mg <sup>2+</sup> -Wat] | (E2)<br>E2:[Ca <sup>2+</sup> - intron] | (E3)<br>E3:[Ca <sup>2+</sup> - Wat] | (E4)<br>[Mg <sup>2+</sup> -intron] |                                                                        |
| Pre-hydrolytic (2s)             | B3LYP/6-31+G*                   | 1            | -934.886655                     | -7330.8419777                          | -1890.0082931                       | -6375.8670408                      | -92.06                                                                 |
|                                 |                                 | 2            | -934.8676079                    | -7330.8572319                          | -1889.9911469                       | -6375.8439611                      | -69.19                                                                 |
|                                 |                                 | 3            | -934.8864372                    | -7330.8445735                          | -1890.006156                        | -6375.8652379                      | -88.09                                                                 |
|                                 |                                 | 4            | -934.8738276                    | -7330.8378888                          | -1890.0079453                       | -6375.8341293                      | -81.80                                                                 |
|                                 |                                 | 5            | -934.8794103                    | -7330.8388081                          | -1890.00974                         | -6375.8689337                      | -100.69                                                                |
|                                 | <b>Average = -86.37 ± 11.79</b> |              |                                 |                                        |                                     |                                    |                                                                        |
|                                 | MO62X/6-31++G**                 | 1            | -934.853335                     | -7330.4940373                          | -1890.097316                        | -6375.4307981                      | -113.42                                                                |
|                                 |                                 | 2            | -934.8347766                    | -7330.5237078                          | -1890.0882697                       | -6375.3935263                      | -77.38                                                                 |
|                                 |                                 | 3            | -934.8520294                    | -7330.5077563                          | -1890.0991663                       | -6375.4114539                      | -94.65                                                                 |
|                                 |                                 | 4            | -934.8376996                    | -7330.4996245                          | -1890.0985329                       | -6375.3780508                      | -87.39                                                                 |
| 5                               |                                 | -934.8474341 | -7330.5198461                   | -1890.0980402                          | -6375.4103753                       | -88.56                             |                                                                        |
| <b>Average = -92.28 ± 13.34</b> |                                 |              |                                 |                                        |                                     |                                    |                                                                        |
| Post-hydrolytic                 | B3LYP/6-31+G*                   | 1            | -858.4427933                    | -8205.5691657                          | -1813.5849262                       | -7250.6012951                      | -109.35                                                                |
|                                 |                                 | 2            | -858.442724                     | -8205.5652466                          | -1813.5709949                       | -7250.5621825                      | -78.57                                                                 |
|                                 |                                 | 3            | -858.4327475                    | -8205.5729735                          | -1813.5760631                       | -7250.5486238                      | -74.65                                                                 |
|                                 |                                 | 4            | -858.4349697                    | -8205.5587776                          | -1813.5776324                       | -7250.6073027                      | -119.97                                                                |
|                                 |                                 | 5            | -858.4341287                    | -8205.5676876                          | -1813.5755625                       | -7250.5728078                      | -91.96                                                                 |
|                                 | <b>Average = -94.90 ± 19.51</b> |              |                                 |                                        |                                     |                                    |                                                                        |
|                                 | MO62X/6-31++G**                 | 1            | -858.3989058                    | -8205.2012593                          | -1813.6643282                       | -7250.0982393                      | -101.91                                                                |
|                                 |                                 | 2            | -858.3989334                    | -8205.2041156                          | -1813.6535683                       | -7250.0683153                      | -74.57                                                                 |
|                                 |                                 | 3            | -858.3902645                    | -8205.213749                           | -1813.6574403                       | -7250.0408083                      | -59.13                                                                 |
|                                 |                                 | 4            | -858.3908214                    | -8205.2120212                          | -1813.658209                        | -7250.1213082                      | -110.86                                                                |
| 5                               |                                 | -858.3924048 | -8205.2041254                   | -1813.6574645                          | -7250.0759797                       | -85.91                             |                                                                        |
| <b>Average = -86.48 ± 20.75</b> |                                 |              |                                 |                                        |                                     |                                    |                                                                        |

**Table S6.** Comparison of estimated  $\Delta E$  for two free state models (incomplete solvation and complete solvation models). Explicit solvation model of the metal ions in the free state (**red bold**).  $\Delta E$  depends on the solvation model of the ions in the free state. The negative sign of  $\Delta E$  confirms that  $Mg^{2+}$  is preferred over  $Ca^{2+}$  in the lariat intron binding pocket. The explicit solvation model of the free  $Mg^{2+}$  included six water molecules from the first shell coordination sphere and another water molecule from 2nd coordination shell. The explicit solvation model of the free  $Ca^{2+}$  included first shell coordination (i.e., seven water molecules). Ten representative snapshots are taken from the MD trajectories and averaged for estimating  $\Delta E$  (4<sup>th</sup> column).

| System                    | Theory          | $\Delta E$ (in kcal mol <sup>-1</sup> )      |                                            |
|---------------------------|-----------------|----------------------------------------------|--------------------------------------------|
|                           |                 | Incomplete solvation shell in the free state | Complete solvation shell in the free state |
| Pre-hydrolytic (2s) state | B3LYP/6-31+G*   | -86.37                                       | <b>-11.35</b>                              |
|                           | MO62X/6-31++G** | -92.28                                       | <b>-20.67</b>                              |
| Post-hydrolytic state     | B3LYP/6-31+G*   | -94.90                                       | <b>-12.17</b>                              |
|                           | MO62X/6-31++G** | -86.48                                       | <b>-6.89</b>                               |

**Table S7.** Intron and ion were described as a single dielectric medium with a dielectric constant of 2 or 4; solvent was treated as another structure-less medium with a dielectric constant of 80. The boundary between the low and high dielectric media was computed with a probe sphere of radius 2 Å. The system was discretized using a cubic grid with 163 regularly spaced planes and a spacing of 1 Å. The ionic strength in the aqueous medium was set to 0.15 M. The Poisson equation was solved numerically using the PBEQ module of the CHARMM program. 1000 snaps with 2 ps interval from the MD trajectories of the end states (alchemical simulation) were used for estimating the electrostatic solvation free energy associated with divalent metal ion binding to lariat intron ( $\Delta G_{PB}$ ). Negative  $\Delta G_{PB}$  indicated favorable ion binding; magnitude indicated  $Mg^{2+}$  binding to the lariat-intron is favored relative to  $Ca^{2+}$ .

| State                 | $Mg^{2+}$ , $Mg^{2+}$ -binding to Lariat<br>$\Delta G_{PB}^{Mg^{2+}}$ in kcal/mol | $Ca^{2+}$ , $Ca^{2+}$ -binding to Lariat<br>$\Delta G_{PB}^{Ca^{2+}}$ in kcal/mol |
|-----------------------|-----------------------------------------------------------------------------------|-----------------------------------------------------------------------------------|
| Pre-hydrolytic state  | ( $\epsilon = 2$ ) $-96.85 \pm 9.40$                                              | ( $\epsilon = 2$ ) $-19.88 \pm 10.51$                                             |
|                       | ( $\epsilon = 4$ ) $-87.42 \pm 5.44$                                              | ( $\epsilon = 4$ ) $-47.88 \pm 5.91$                                              |
| Post-hydrolytic state | ( $\epsilon = 2$ ) $-96.55 \pm 10.33$                                             | ( $\epsilon = 2$ ) $-28.71 \pm 9.34$                                              |
|                       | ( $\epsilon = 4$ ) $-82.21 \pm 5.28$                                              | ( $\epsilon = 4$ ) $-47.30 \pm 4.78$                                              |



**Figure S1.** MD simulation setup: Truncated model of 25Å radii sphere centered at P atom of the residue ADE 574 of lariat group II intron was considered for MD simulations. Heavy atoms of the “buffer region” (22Å-25Å) were harmonically restrained to their experimentally determined positions, and a water box of edge length 80Å was overlaid. The solvated truncated model was then subjected to minimization, equilibration, production MD, followed by alchemical free energy calculations.

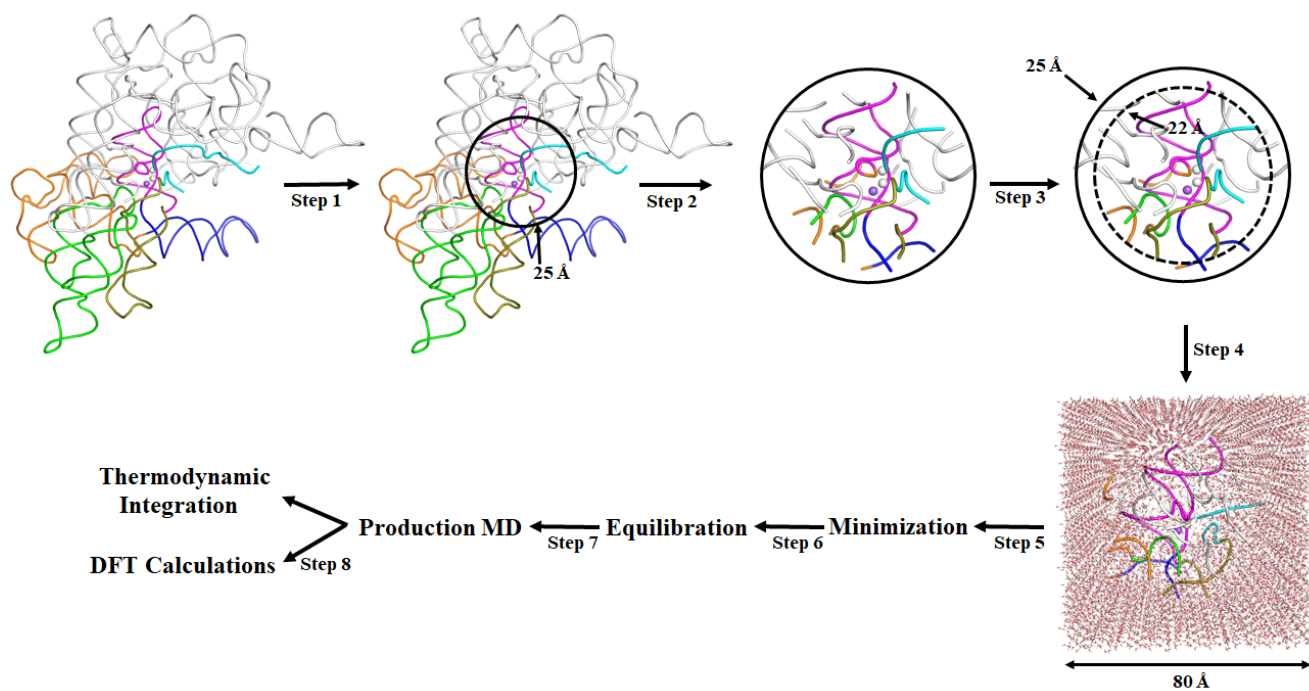

**Figure S2.** Binding pocket models (M1, M2 site) were considered for quantum chemical calculations. (a,b) Pre-hydrolytic (2s) state (c,d) Post-hydrolytic state. Nucleotide bases were replaced by the methyl group.  $Mg^{2+}$  in white sphere and  $Ca^{2+}$  in cyan sphere.

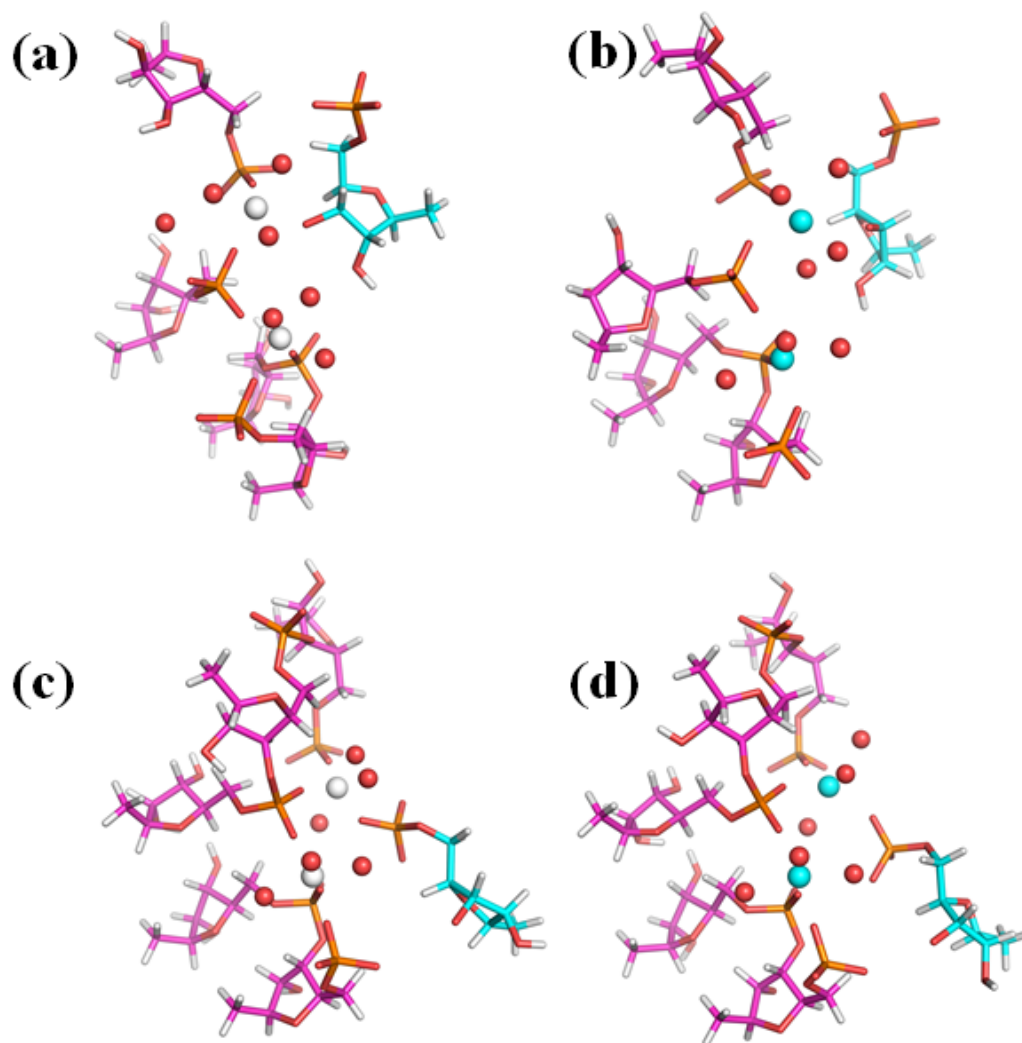

**Figure S3.** RMSD vs. Time plot from 100ns trajectory: (a) Root-mean-square deviation of heavy atoms within 22Å radius of the active site pocket of lariat group II intron relative to template X-ray structures. Pre-hydrolytic (2s) (black), post-hydrolytic (red). Structural comparison [MD (coloured) and X-ray (Grey)]: (b) Pre-hydrolytic (2s), (c) post-hydrolytic. The non-hydrogen atoms of the RNA in the “buffer region” (22-25Å from the centre) were harmonically restrained to their experimentally resolved positions. Thus, RMSD estimation, including the buffer region, will bias the result by reducing the overall structural deviation between the MD and template structure. Thus, we reported RMSD excluding the portions of the backbone that are harmonically restrained (buffer region).

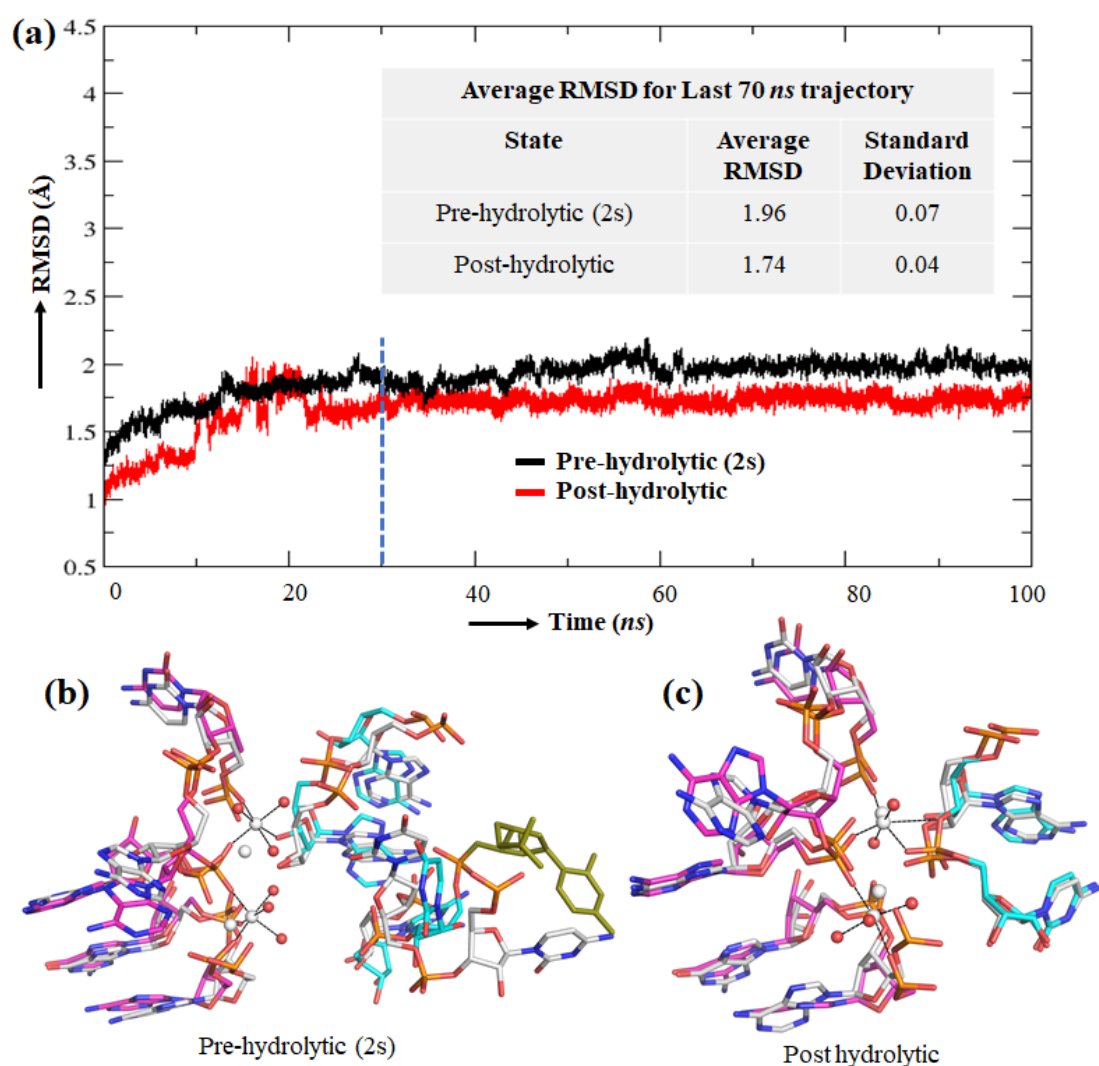

**Figure S4.** Root-mean-square fluctuation (RMSF) of the heavy atoms of RNA nucleotides of lariat group II introns. Average RMSF was computed from the last 50 ns of post equilibrated MD trajectory. Right-side (exon-part) and left-side (intron-part) of vertical line (black line). The metal-ion binding pocket residues are marked with black/red arrows.

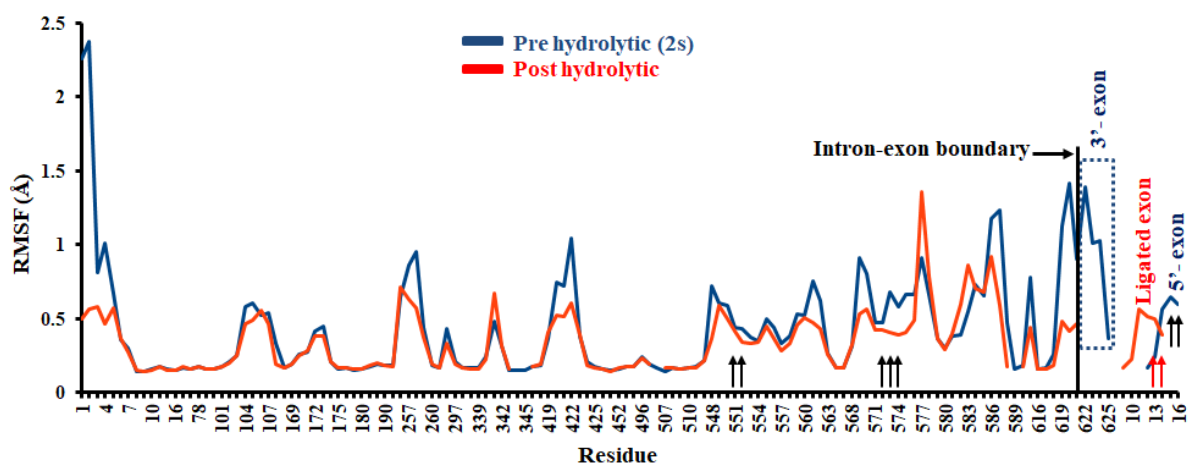

**Figure S5.** MD structures of the K1 binding pocket in the pre-hydrolytic (2s) state from six independent MD runs. Left ( $K^+$  bound), Right ( $Na^+$  bound)

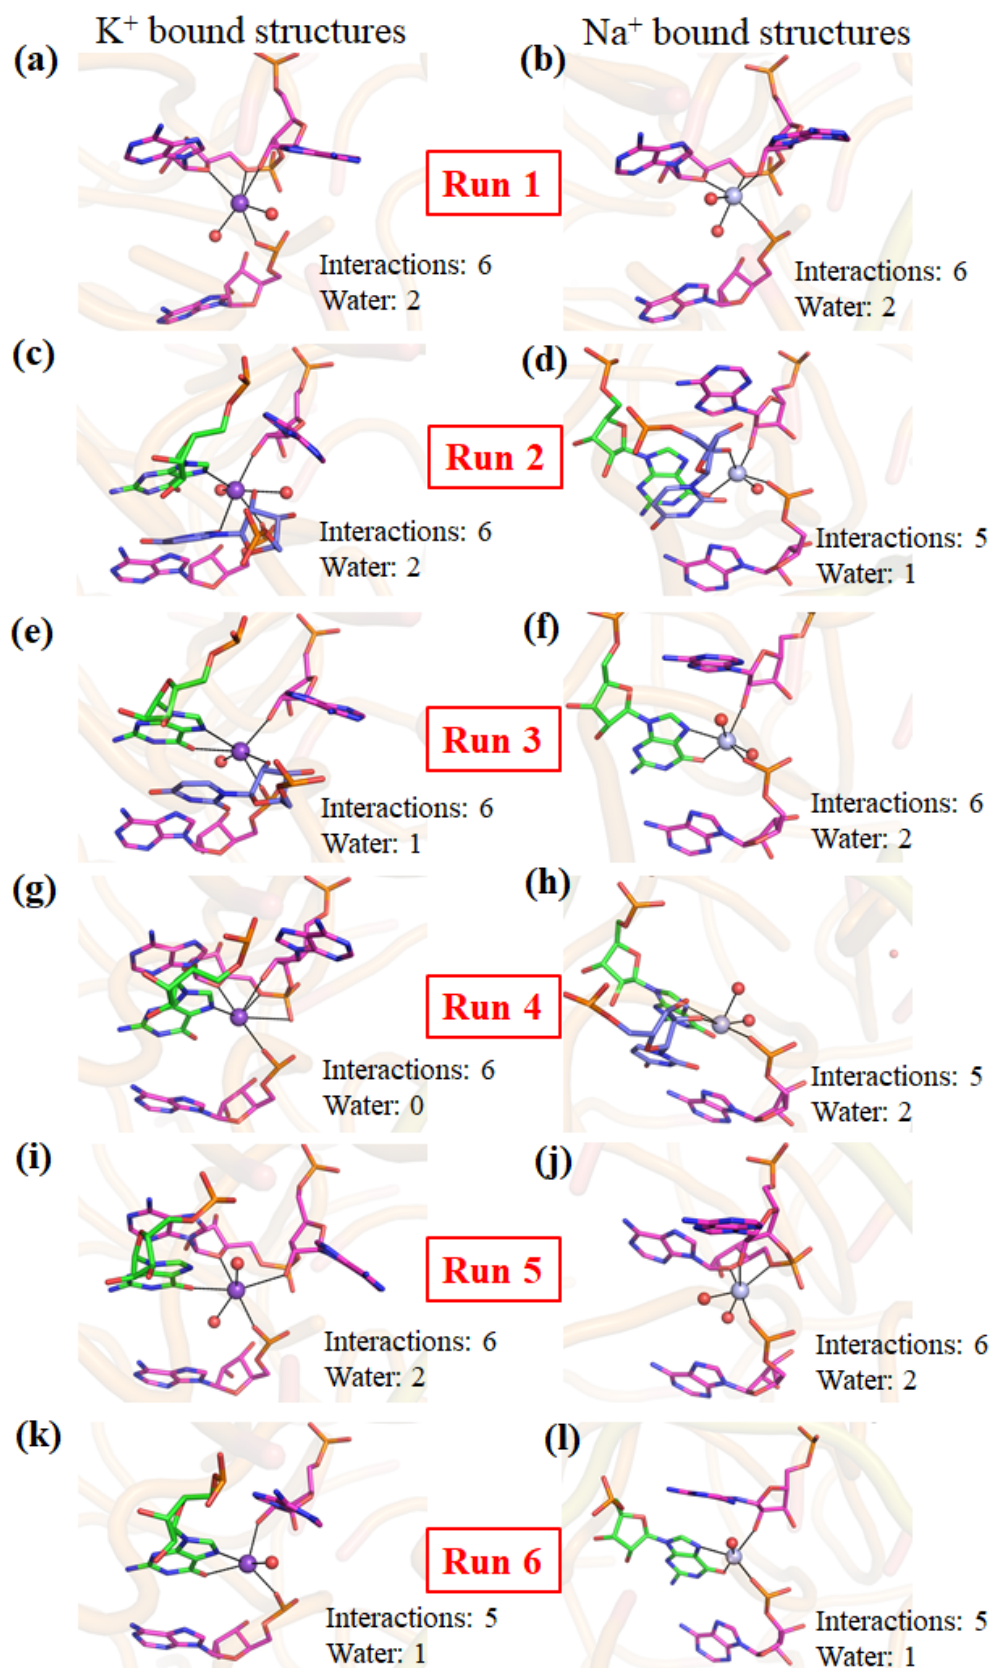

**Figure S6.** MD structures of the K1 binding pocket in the post-hydrolytic state from five independent MD runs. Left ( $K^+$  bound), Right ( $Na^+$  bound)

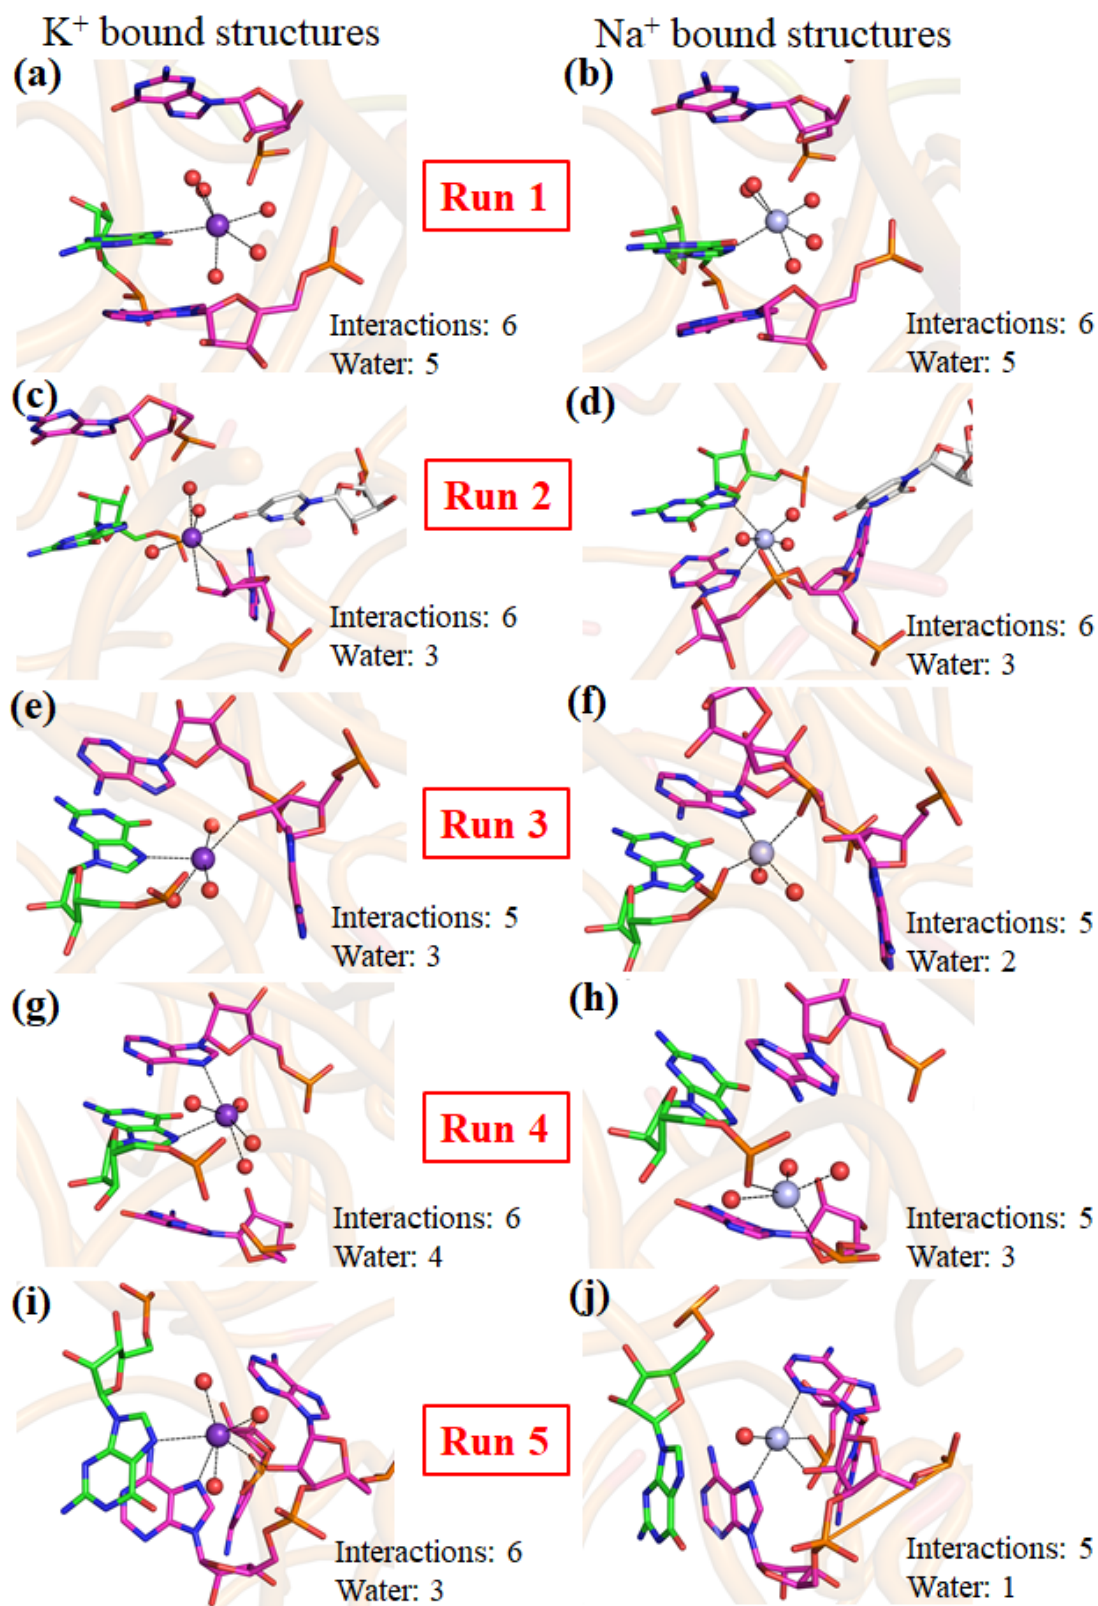

Supplement: d2cp03472g1.pdf [file d2cp03472g1.pdf]
